# Supplementary material
Source: ML conference proceedings conference paper supplement (https://openaccess.thecvf.com/content/ICCV2021/html/Moreira_Rotation_Averaging_in_ICCV_2021_paper.html)
Supplement: Supplementary file 1 [file Moreira_Rotation_Averaging_in_ICCV_2021_supplemental.pdf]

# Rotation Averaging in a Split Second: A Primal-Dual Method and a Closed-Form for Cycle Graphs

## Supplemental Material

Gabriel Moreira   Manuel Marques   João Paulo Costeira  
Institute for Systems and Robotics, Instituto Superior Técnico  
Av. Rovisco Pais, Lisboa Portugal

### A. Convergence plots

We provide in this section plots showing the convergence of our primal-dual method (RAveSS) in six of the datasets evaluated in Section 6.1 (Table 1). Recall that if  $(\Lambda^* - \tilde{R})R^* = 0$  and  $\Lambda^* - \tilde{R} \succeq 0$ , the primal-dual pair  $(R^*, \Lambda^*)$  is globally optimal. In the six plots of Fig. 5 we can observe the smallest eigenvalue of  $\Lambda^k - \tilde{R}$  converging to zero.

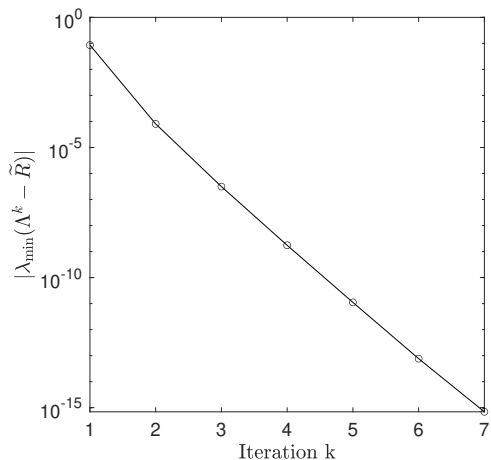

(a) smallGrid3D (n=125). Time/iteration: 0.005s.

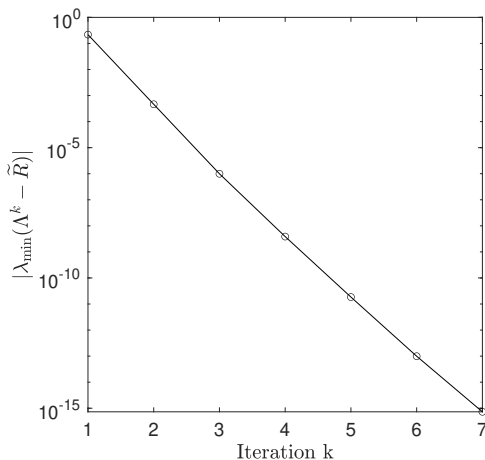

(b) Sphere (n=2200). Time/iteration: 0.07s.

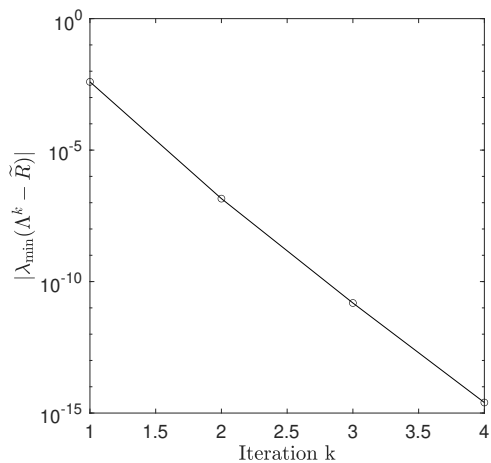

(c) Torus3D (n=5000). Time/iteration: 0.12s.

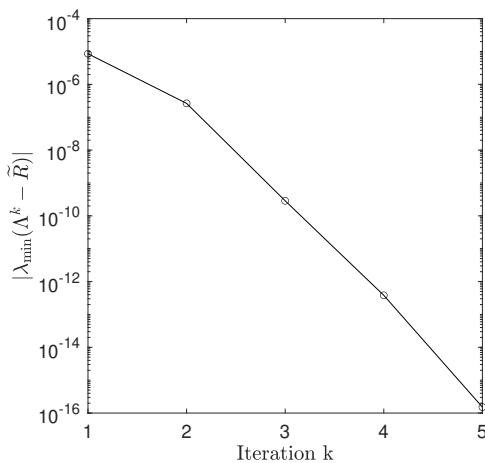

(d) Cubicle (n=5750). Time/iteration: 0.11s

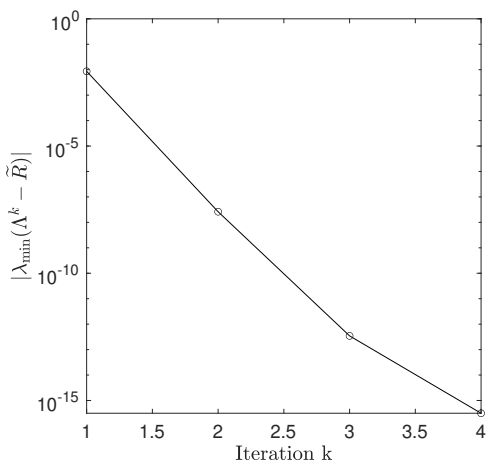

(e) Grid3D (n=8000). Time/iteration: 0.48s

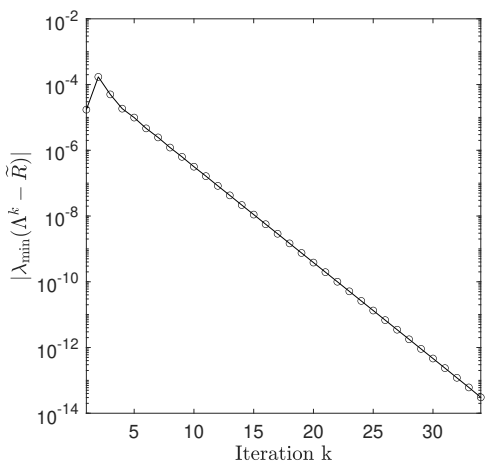

(f) Rim (n=10195). Time/iteration: 0.2s

Figure 5: Convergence of the smallest eigenvalue of  $\Lambda^k - \tilde{R}$  per iteration  $k$  of RAVESS.
